# Supplementary material
Source: Elsevier journal article supplement (https://www.sciencedirect.com/science/article/pii/S2173574322000132)
Supplement: mmc1 [file S2173574322000132:mmc1.pdf]

**Encuesta de la Sociedad Española de Reumatología (SER), Grupo de Trabajo de Ecografía (ECOSER)- Área de Enfermedades Pulmonares Intersticiales Difusas (EPID) de la Sociedad Española de Neumología y Cirugía Torácica (SEPAR) sobre la Educación y el Uso de la Ecografía Pulmonar en España**

**1. ¿Cuál es tu especialidad médica?**

Reumatología

Neumología

Cirugía Torácica

Neumología pediátrica

Reumatología pediátrica

Medicina Interna

Medicina de Familia

Medicina Física y Rehabilitación

Medicina Intensiva

Otra

**2. Género**

Hombre

Mujer

Otros

**3. Edad**

<30

30-40

40-50

50-60

60-70

70-80

>80

**4. ¿Trabajas en?**

Medicina pública

Medicina privada

Medicina pública y privada

**5. ¿Tu centro/hospital es universitario?**

Si

No

**6. ¿Tu centro/hospital tiene residentes de tu especialidad?**

Si

No

**7. ¿Formas parte o participas en una Unidad de EPID?**

Si  
No

**8. ¿En tu Unidad de EPID hay los siguientes especialistas? (puedes contestar más de una opción)**

Neumólogo  
Reumatólogo  
Médico Internista  
Radiólogo  
Patólogo  
Cirujano torácico  
Otros  
No aplicable (no formo parte/participo en una Unidad de EPID)

**9. ¿Realizas ecografía pulmonar en tu práctica clínica?**

Si  
No

**10. ¿Realizas ecografía pulmonar con fines de investigación clínica?**

Si  
No

**11. ¿Realizas ecografía pulmonar con fines de investigación básica/traslacional?**

Si  
No

**12. ¿En tu servicio/sección/unidad se realiza ecografía pulmonar en la consulta clínica?**

Si  
No

**13. ¿En tu servicio/sección/unidad se realiza ecografía pulmonar en el área de hospitalización?**

Si  
No

**14. ¿En tu servicio/sección/unidad existe un Consulta monográfica/Subunidad de ecografía pulmonar?**

Si  
No

**15. ¿En qué patologías realizas ecografía pulmonar? (puedes contestar más de una opción)**

Derrame pleural  
Neumotórax

Tumores u otros procesos pleurales  
Consolidación pulmonar  
Alteración intersticial  
Procesos de la pared torácica o del diafragma  
Derrame pericárdico  
Guía de toracocentesis o biopsia pleural  
No aplicable (no realizo ecografía pulmonar)

**16. ¿Realizas ecografía pulmonar en las EPID?**

Si  
No

**17. ¿Con qué propósito realizas ecografía pulmonar en las EPID? (puedes contestar más de una opción)**

Diagnóstico  
Monitorización de la respuesta terapéutica  
Ayuda a decisión terapéutica  
Investigación  
No aplicable (no realizo ecografía pulmonar en EPID)

**18. ¿Cuándo realizas ecografía pulmonar en las EPID evalúas?**

Líneas B  
Pleura  
Líneas B y pleura  
No aplicable (no realizo ecografía pulmonar en EPID)

**19. ¿Cómo te formaste en ecografía pulmonar? (puedes contestar más de una opción)**

Cursos teóricos  
Cursos teórico-prácticos con modelos sanos  
Cursos teórico-prácticos con modelos sanos y patológicos  
En mi propio servicio/sección/unidad bajo supervisión de experto/s  
En otros servicios (Radiodiagnóstico, otros) de mi centro/hospital  
En otro centro nacionales diferentes al que trabajo/trabajaba cuando me formé  
En otro centro extranjero diferentes al que trabajo/trabajaba cuando me formé  
No aplicable (no he recibido formación en ecografía pulmonar)

**20. ¿La formación en ecografía pulmonar que recibí procedía de? (puedes contestar más de una opción)**

Sociedades científicas nacionales/regionales  
Sociedades científicas internacionales  
Universidades nacionales  
Universidades extranjeras  
Compañías farmacéuticas o tecnológicas  
Organismos del Sistema de Salud nacional o regional

Otros

No aplicable (no he recibido formación en ecografía pulmonar)

**21. ¿Crees que la formación en ecografía pulmonar para neumólogos y reumatólogos debe consistir y constar de? (puedes contestar más de una opción)**

Cursos teóricos

Cursos teórico-prácticos con modelos sanos

Cursos teórico-prácticos con modelos sanos y patológicos

Realización de un número mínimo de exploraciones supervisadas por un experto/s

Evaluación y acreditación de competencia mediante examen teórico-práctico

Evaluación y acreditación de competencia mediante visto bueno de un número de exploraciones por un experto/s

Evaluación y acreditación de competencia mediante examen teórico-práctico y visto bueno de un número de exploraciones por un experto/s

No aplicable (no creo que deban formarse en ecografía pulmonar)

**22. ¿Crees que debe fomentarse una formación estructurada en ecografía pulmonar, con evaluación de competencia, para neumólogos y reumatólogos interesados e implicados en procesos patológicos en los que esta modalidad de imagen puede aportar un valor añadido?**

Si

No
